# Supplementary material
Source: Hindawi journal article supplement (doi:10.1155/2011/925073)
Supplement: f1 [file 925073.f1.pdf]

# Supplementary Figure 1

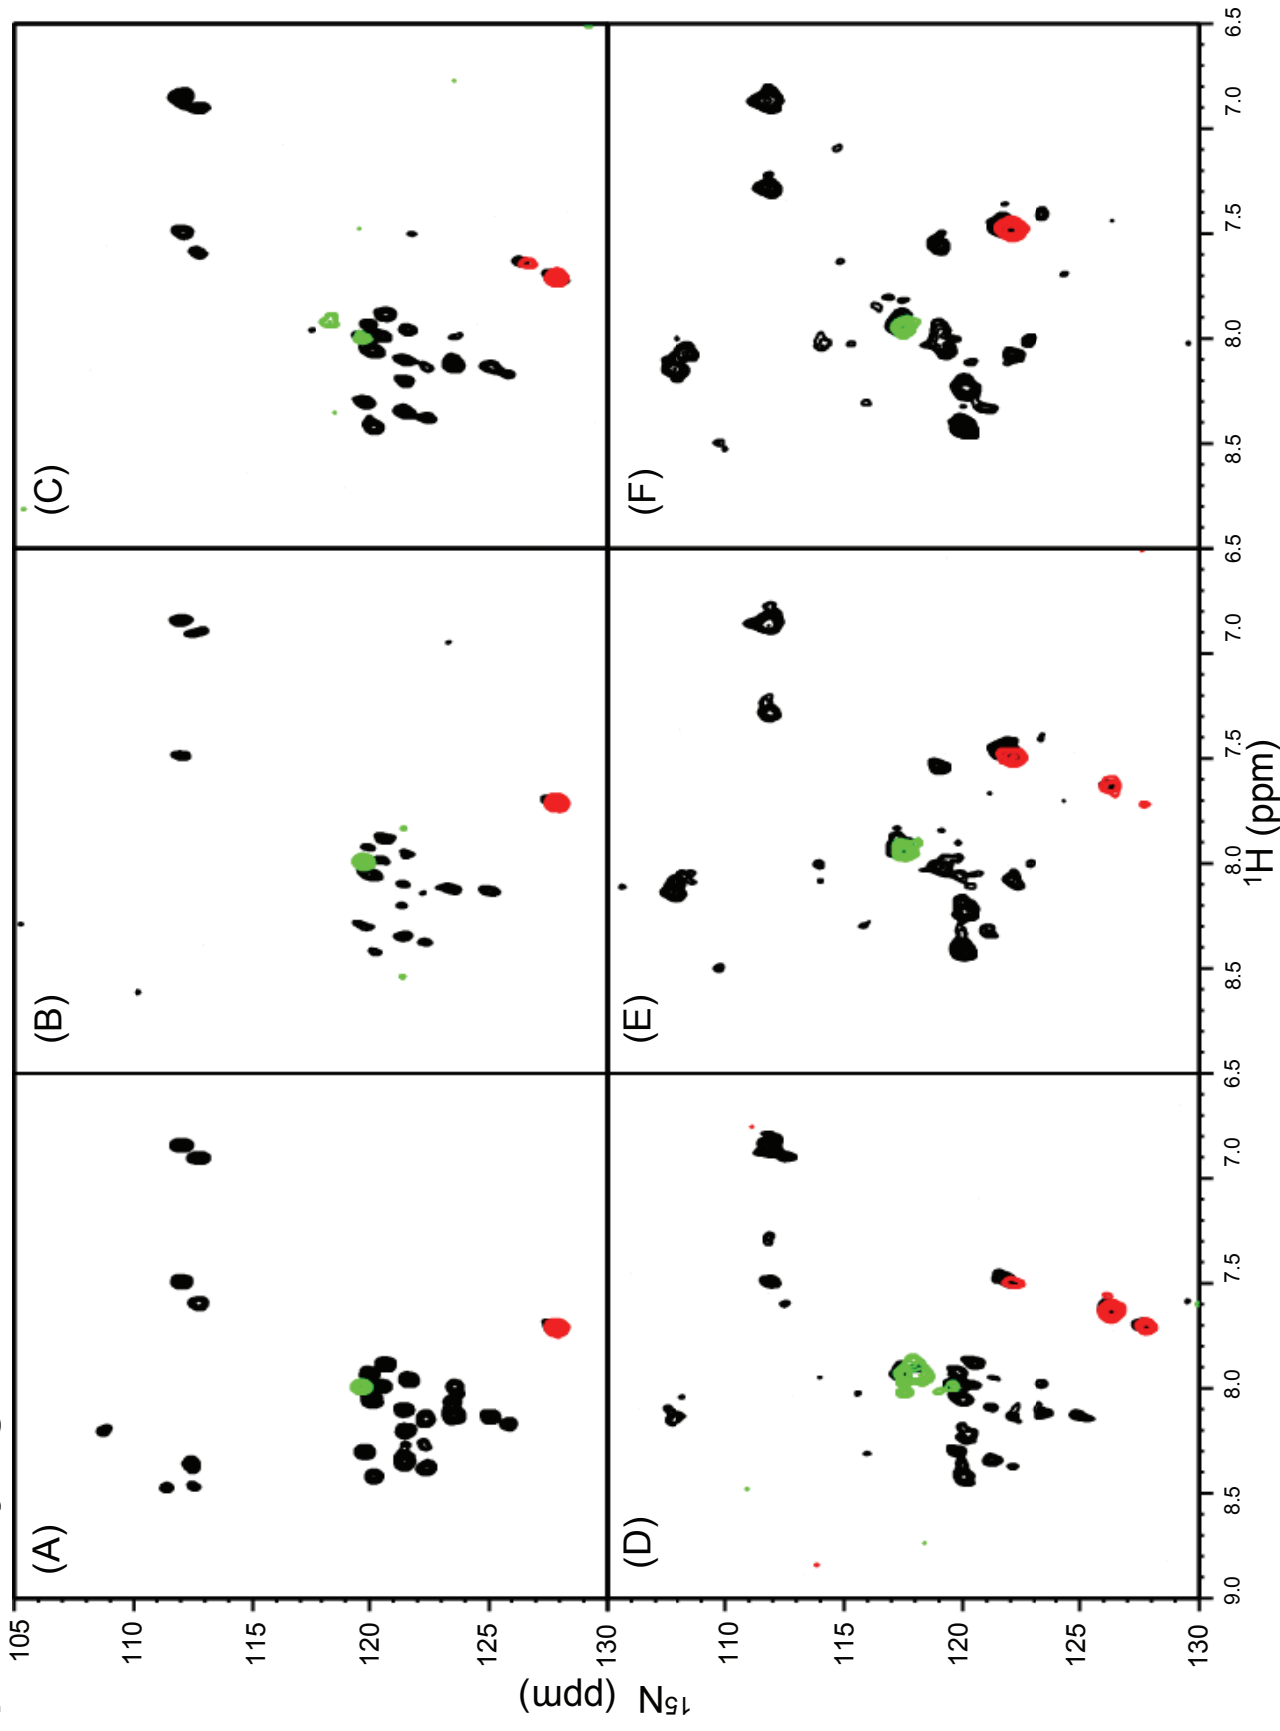

**Supplementary Figure 1.**  $^1\text{H}$ - $^{15}\text{N}$  HSQC spectra of  $^{15}\text{N}$ -labelled A $\beta$ (1-40) titrated with GM1. Spectral data were obtained using 0.2 mM A $\beta$ (1-40) proteins uniformly  $^{15}\text{N}$ -labelled (black) or selectively  $^{15}\text{N}$ -labelled at Val<sup>39</sup> (green) or Val<sup>40</sup> (red). A $\beta$ /GM1 molar ratios were (A) 1:0, (B) 1:2, (C) 1:5, (D) 1:15, (E) 1:20 and (F) 1:30.
